# Supplementary material for: Controllable synthesis of silver nanoparticles in hyperbranched macromolecule templates for printed flexible electronics
Source: Royal Society of Chemistry journal article supplement (doi:10.1039/c5ra00132c), 2015-01-01
Supplement: c5ra00132c1.pdf [file c5ra00132c1.pdf]

# Controllable synthesis of silver nanoparticles in hyperbranched macromolecule templates for printed flexible electronics

Zhiliang Zhang,<sup>\*ab</sup> and Huayong Zhang<sup>a</sup>

<sup>1</sup>Research Center of Analysis and Test, Qilu university of technology, Jinan 250353, China

<sup>2</sup>Beijing National Laboratory for Molecular Sciences (BNLMS), Institute of Chemistry, Chinese Academy of Sciences, Beijing 100190, China.

\*E-mail: [zhzhl@iccas.ac.cn](mailto:zhzhl@iccas.ac.cn)

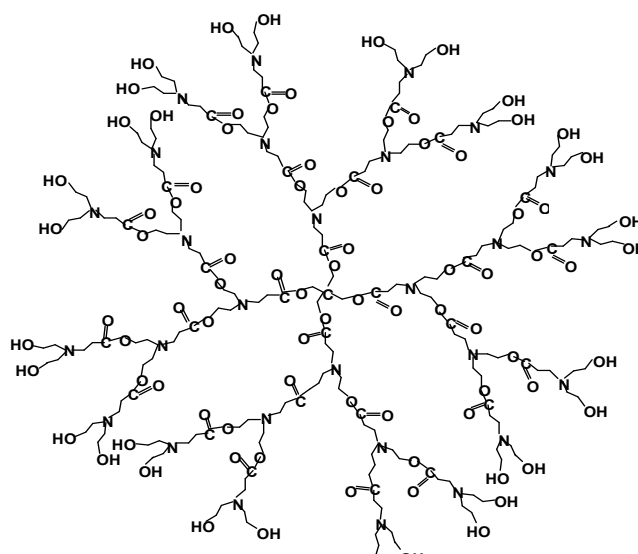

**Fig.S1** Structure of HBMs with pentaerythritol as core.

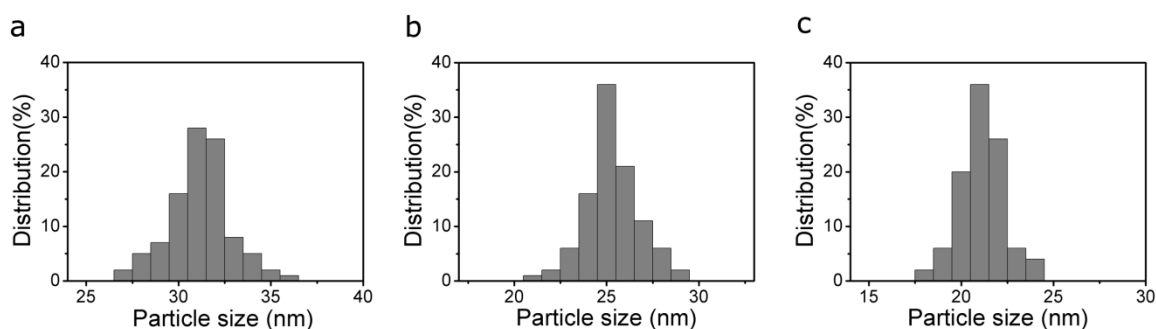

**Fig. S2** The size distribution histograms of synthesized AgNPs encapsulated with G4 (a), G5 (b) and G6 HBMs (c) respectively.

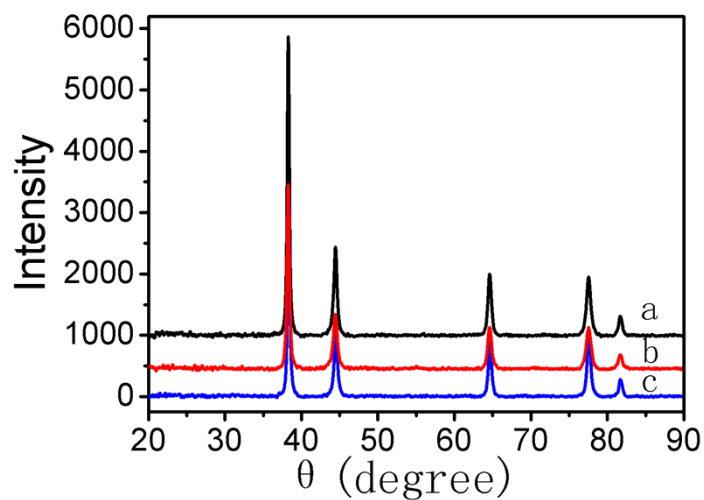

**Fig.S3** XRD spectra of the synthesized AgNPs encapsulated with G4 (curve a), G5(curve b) and G6 HPMS(curve c) respectively.

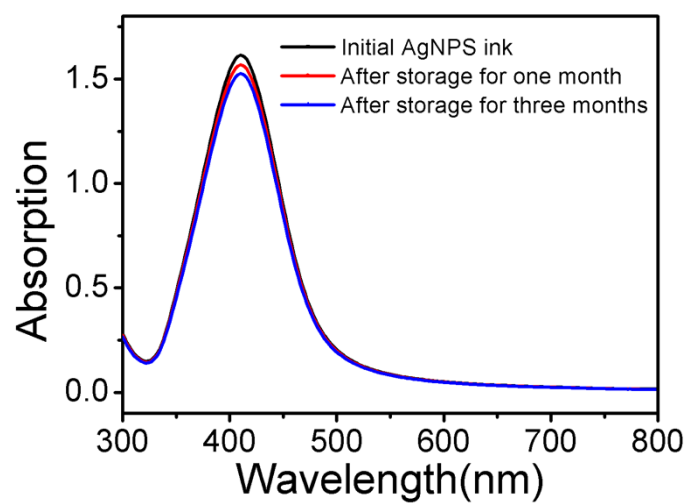

**Fig.S4** The plasmon absorption band of AgNPs conductive ink at different storage time.

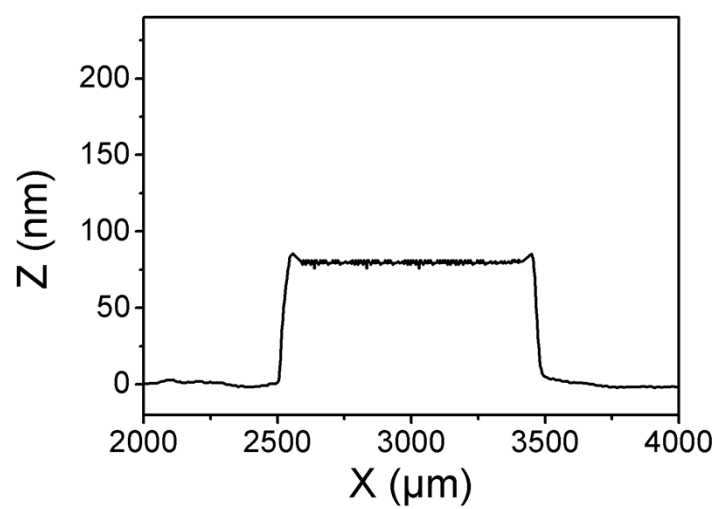

**Fig. S5** The cross-sectional profile of the printed electrocircuits.
